# Supplementary material for: Predictive Modelling for High-risk Stage II Colon Cancer Using Auto-artificial Intelligence
Source: Research Square preprint supplement (doi:10.21203/rs.3.rs-1725478/v1), 2022-06-07
Supplement: Supplementary file 1 [file 0d85750ab199cfe85a96be2d.xlsx]

## Sheet: Table 3
	Table 3 Importance of prognostic variables for recurrence
		Distribution factor	IOV
	Age	<66 years	0.006
	Sex	Male	0.007
	Body mass index, kg/m2	>21.9 kg/m2	0.003
	Performance status	>1	0.008
	Obstruction	Yes	0.012*
	Penetration	Yes	0.007
	Tumor size	>51	0.004
	Pathological T factor	T4	0.008
	Surgical procedure	Lap	0.004
	Preoperative CEA	>5.0 ng/mL	0.047*
	Histological type	Poorly differentiated	0.008
	Number of harvested LNs	<12	0.005
	Venous invasion	Positive	0.014*
	Lymphatic invasion	Positive	0.008
	CEA carcinoembryonic antigen, LNs lymph nodes, *High risk factor
	IOV importance of variables
