# Supplementary material for: Predictive Modelling for High-risk Stage II Colon Cancer Using Auto-artificial Intelligence
Source: Research Square preprint supplement (doi:10.21203/rs.3.rs-1725478/v1), 2022-06-07
Supplement: Supplementary file 2 [file 2290d438e8ab4c42cac723d1.xlsx]

## Sheet: Table 2
	Table 2 Summary of the distribution of cancer recurrence
		n = 259
	Recurrence	37 (14.3%)
	Sites (including multiple selections)
	Liver	15 (5.8%)
	Lung	11 (4.2%)
	Peritoneal dissemination	5 (1.9%)
	Local	8 (3.1%)
	Anastomosis	4 (1.5%)
	Regional lymph node	4 (1.6%)
	Other sites	5 (1.9%)
