# Supplementary material for: Predictive Modelling for High-risk Stage II Colon Cancer Using Auto-artificial Intelligence
Source: Research Square preprint supplement (doi:10.21203/rs.3.rs-1725478/v1), 2022-06-07
Supplement: Supplementary file 3 [file d8811ec063fc4e52e946e81e.xlsx]

## Sheet: Table 1
	Table 1 Patient medical and demographic characteristics
		n = 259
	Age, years	66 (28–88)
	Sex, n (%)
	Male	154 (59.5)
	Female	105 (40.5)
	Body mass index, kg/m2	21.9 (15.2–33.5)
	Performance status, n (%)
	0–1	243 (93.8)
	2–3	16 (6.2)
	Obstruction, n (%)	24 (9.3)
	Penetration, n (%)	10 (3.9)
	Tumor size, mm	51 (11–142)
	Pathological T, n (%)
	T3	229 (88.4)
	T4	30 (11.6)
	Surgical procedure, n (%)
	Open	178 (68.7)
	Lap	81 (31.3)
	Preoperative CEA, ng/mL	4.9 (0.6–125)
	Histological type, n (%)
	Poorly differentiated	242 (93.4)
	Other types	17 (6.6)
	Number of harvested LNs	15 (0-72)
	Venous invasion, n (%)
	Positive	168 (64.9)
	Negative	91 (35.1)
	Lymphatic invasion, n (%)
	Positive	189 (62.9)
	Negative	70 (27.1)
	CEA carcinoembryonic antigen, LN, lymph node
	Values are presented as medians and ranges or as counts and percentages,
	as appropriate.
